# Supplementary material for: A Metabolomic Approach to Assess the Toxicity of the Olive Tree Endophyte Bacillus sp. PTA13 Lipopeptides to the Aquatic Macrophyte Lemna minor L
Source: MDPI journal article supplement (doi:10.3390/toxics10090494), 2022-08-25
Supplement: s1 [file s1]

**Table S1.** Composition of Steinberg medium for the cultivation of *Lemna minor* L.

| Macroelements                                         | M.W.   | mg L <sup>-1</sup> | mmol L <sup>-1</sup> |
|-------------------------------------------------------|--------|--------------------|----------------------|
| KNO <sub>3</sub>                                      | 101.12 | 350.00             | 3.46                 |
| Ca(NO <sub>3</sub> ) <sub>2</sub> □ 4H <sub>2</sub> O | 236.15 | 295.00             | 1.25                 |
| KH <sub>2</sub> PO <sub>4</sub>                       | 136.09 | 90.00              | 0.66                 |
| K <sub>2</sub> HPO <sub>4</sub>                       | 174.18 | 12.60              | 0.072                |
| MgSO <sub>4</sub> □ 7H <sub>2</sub> O                 | 246.37 | 100.00             | 0.41                 |
| Microelements                                         | M.W.   | mg L <sup>-1</sup> | mmol L <sup>-1</sup> |
| H <sub>3</sub> BO <sub>3</sub>                        | 61.83  | 120.00             | 1.94                 |
| ZnSO <sub>4</sub> □ 7H <sub>2</sub> O                 | 287.43 | 180.00             | 0.63                 |
| Na <sub>2</sub> MoO <sub>4</sub> □ 2H <sub>2</sub> O  | 241.92 | 44.00              | 0.18                 |
| MnCl <sub>2</sub> □ 4H <sub>2</sub> O                 | 197.84 | 180.00             | 0.91                 |
| FeCl <sub>3</sub> □ 6H <sub>2</sub> O                 | 270.21 | 760.00             | 2.81                 |
| EDTA Disodium-dihydrate                               | 372.24 | 1500.00            | 4.03                 |
