# Supplementary material for: A Metabolomic Approach to Assess the Toxicity of the Olive Tree Endophyte Bacillus sp. PTA13 Lipopeptides to the Aquatic Macrophyte Lemna minor L
Source: MDPI journal article supplement (doi:10.3390/toxics10090494), 2022-08-25
Supplement: s1 [file s1]

**Table S2.** Composition of the stock solutions for the preparation of Steinberg medium.

| Stock Solution | Macroelements                                         | g L <sup>-1</sup>  |
|----------------|-------------------------------------------------------|--------------------|
| I              | KNO <sub>3</sub>                                      | 17,50              |
|                | KH <sub>2</sub> PO <sub>4</sub>                       | 4,50               |
|                | K <sub>2</sub> HPO <sub>4</sub>                       | 0,63               |
| II             | MgSO <sub>4</sub> □ 7H <sub>2</sub> O                 | 5,00               |
| III            | Ca(NO <sub>3</sub> ) <sub>2</sub> □ 4H <sub>2</sub> O | 14,75              |
| Stock Solution | Microelements                                         | mg L <sup>-1</sup> |
| IV             | H <sub>3</sub> BO <sub>3</sub>                        | 120,00             |
| V              | ZnSO <sub>4</sub> □ 7H <sub>2</sub> O                 | 180,00             |
| VI             | Na <sub>2</sub> MoO <sub>4</sub> □ 2H <sub>2</sub> O  | 44,00              |
| VII            | MnCl <sub>2</sub> □ 4H <sub>2</sub> O                 | 180                |
| VIII           | FeCl <sub>3</sub> □ 6H <sub>2</sub> O                 | 760,00             |
|                | EDTA Disodium-dihydrate                               | 1.500,00           |
